# Supplementary material for: Multifunctional metallo-supramolecular interlocked hexagonal microstructures for the detection of lead and thiols in water
Source: Royal Society of Chemistry journal article supplement (doi:10.1039/c8cc05814h), 2018-01-01
Supplement: c8cc05814h1.pdf [file c8cc05814h1.pdf]

## Multifunctional metallo-supramolecular interlocked hexagonal microstructures for the detection of lead and thiols in water

Prabhpreet Singh\*<sup>a</sup>, Lalit Singh Mittal<sup>a</sup>, Kapil Kumar<sup>a</sup>, Poonam Sharma<sup>a</sup>, Gaurav Bhargava<sup>b</sup> and Subodh Kumar<sup>a</sup>

*Department of Chemistry, UGC Centre for Advanced Studies-II, Guru Nanak Dev University, Amritsar 143 005, India.*

*e-mail: prabhpreet.chem@gndu.ac.in; Tel: +91-84271-01534*

*Department of Chemical Sciences, IK Gujral Punjab Technical University, Kapurthala-144601, Punjab, India.*

### EXPERIMENTAL SECTION

#### Measurements and Methods

Chemicals and solvents (reagent grade) were obtained from common suppliers such as Sigma-Aldrich, S D Fine-Chem Limited (SDFCL), Spectrochem and were used without further purification, unless otherwise stated. All reactions were performed under N<sub>2</sub>. N-Methyl-2-pyrrolidone (NMP) was dried over 4Å molecular sieves. THF, DMSO and CH<sub>3</sub>CN solvents were of HPLC grade. Deionized water was obtained from ULTRA UV/UF Rions Lab Water System Ultra 370 series device.

#### Chromatography

Chromatographic purification was performed with silica gel 60-120 mesh. TLC was performed on aluminium sheets coated with silica gel 60 F254 (Merck, Darmstadt).

#### NMR Spectroscopy

<sup>1</sup>H and <sup>13</sup>C NMR spectra were recorded on a BRUKER Biospin AVANCE-III FT-NMR HD-500 spectrophotometer using CDCl<sub>3</sub> or DMSO(*d*<sub>6</sub>) as solvent. The peak values were obtained as ppm (δ), and referenced to tetramethylsilane (TMS) for <sup>1</sup>H NMR spectroscopy and the residual solvent signal for <sup>13</sup>C NMR spectroscopy. Data are reported as follows: chemical shifts in ppm, coupling constant J in Hz; multiplicity (s = singlet, bs = broad singlet, t = triplet, q = quartet, m = multiplet). Concentration based <sup>1</sup>H NMR spectroscopic titration of **PDI-HQ** and <sup>1</sup>H NMR spectroscopic titration of **PDI-HQ** against Pb<sup>2+</sup> were performed in DMSO(*d*<sub>6</sub>)-H<sub>2</sub>O (9:1 v/v) on Bruker-AVANCE-II FT-NMR AL400 spectrometer. All data were then processed in delta

software to draw the stacking spectra of **PDI-HQ** and **PDI-HQ + Pb<sup>2+</sup>** complex at different concentrations.

### **UV-Vis and Fluorescence Spectroscopy measurements**

The absorption spectra were recorded on SHIMADZU-2450 spectrophotometer equipped with a Peltier system to control the temperature. Quartz cells of 1 cm in length were used for sample measurements. The spectral bandwidth and the scan rate were fixed at 2 nm and 140 nm min<sup>-1</sup>, respectively. Fluorescence titrations were performed on a CHRONOS-BH and PerkinElmer LS-55 fluorescence spectrophotometers (slit width: excitation = 10 nm, emission = 2.5 nm) with excitation at 490 nm, unless otherwise stated. Quartz cells of 1 cm in length were used for sample measurements. The concentration of HEPES buffer (pH 7.2) was 0.01 M. Stock solutions for various measurements of **PDI-HQ** were prepared in CH<sub>3</sub>CN and DMSO. For experiments with **PDI-HQ**, we have taken 3 mL of the solution that contains 30 μL **PDI-HQ** in acetonitrile and 2.97 mL of HEPES-buffer (0.01 M, pH = 7.2) in cuvette. Typically aliquots of freshly prepared standard solutions (10<sup>-1</sup> M to 10<sup>-3</sup> M) of Ag<sup>+</sup>, Mg<sup>2+</sup>, Cs<sup>+</sup>, Co<sup>2+</sup>, Ni<sup>2+</sup>, Fe<sup>2+</sup>, Al<sup>3+</sup>, Cr<sup>3+</sup>, K<sup>+</sup>, Mn<sup>2+</sup>, Hg<sup>2+</sup>, Sr<sup>2+</sup>, Cd<sup>2+</sup>, Zn<sup>2+</sup>, Li<sup>+</sup>, Cu<sup>2+</sup> and Ba<sup>2+</sup> as perchlorate or nitrate salts, unless otherwise stated, were prepared in deionized Millipore water and were diluted as required. The stock solution of **PDI-HQ–Pb<sup>2+</sup>** was prepared by mixing of **PDI-HQ** and Pb<sup>2+</sup> (1:30) in 99.9% HEPES-buffer (0.1% CH<sub>3</sub>CN) (0.01 M, pH = 7.2). Typically aliquots of freshly prepared standard solutions (10<sup>-1</sup> M to 10<sup>-3</sup> M) of Cl<sup>-</sup>, H<sub>2</sub>PO<sub>4</sub><sup>-</sup>, HPO<sub>4</sub><sup>2-</sup>, I<sup>-</sup>, NO<sub>2</sub><sup>-</sup>, NO<sub>3</sub><sup>2-</sup>, F<sup>-</sup>, Br<sup>-</sup>, CO<sub>3</sub><sup>2-</sup>, ClO<sub>4</sub><sup>-</sup>, CN<sup>-</sup>, OH<sup>-</sup>, AcO<sup>-</sup>; thiols viz. propanethiol, Cys, bovine serum albumin (BSA), S<sub>2</sub>O<sub>3</sub><sup>2-</sup>, SO<sub>3</sub><sup>2-</sup>, SO<sub>4</sub><sup>2-</sup> and S<sub>2</sub>O<sub>5</sub><sup>2-</sup> in deionized Millipore water were used to record UV-Vis and fluorescence spectra.

### **IR Spectroscopy and Mass Spectrometry**

Fourier transform infrared (FT-IR) spectra were recorded on PerkinElmer 92035 spectrometer. High resolution mass spectra (HRMS) results were recorded on a BRUKER DALTONIK micrOTOF-Q11 spectrometer.

### **Dynamic Light Scattering Measurements**

DLS measurements were performed at (25.0±0.1) °C by using a light-scattering apparatus (Zetasizer Nano ZS Malvern Instrument). The stock solutions of **PDI-HQ** (1 mM, CH<sub>3</sub>CN) and

water were filtered through Millipore membrane filter (Acrodisc syringe filter, 0.45  $\mu\text{m}$  Supor membrane) before measurements to remove interfering impurities. Solutions of **PDI-HQ** in acetonitrile and its mixtures with water or solutions of **PDI-HQ** in  $\text{CH}_3\text{CN}:\text{H}_2\text{O}$  (0.1:99.9, v/v) +  $\text{Pb}^{2+}$  were prepared. 2 mL of each of these solutions was taken in glass cuvette to record the DLS spectrum. The samples were thermally equilibrated for 10 min before each measurement, and an average of 10 measurement runs were considered to be data. The temperature was controlled to an accuracy of  $\pm 0.1$   $^\circ\text{C}$  using an inbuilt Peltier device. Data was analyzed using the standard algorithms.

### **Microscopic Measurements**

Field-emission scanning electron microscopic (FE-SEM) measurements were performed on a JEOL JSM-6610LV (ZEISS SUPRA<sup>TM</sup>55) operating at an acceleration voltage of 10 kV with a tungsten filament as the electron source. High-resolution transmission electron microscopic (HR-TEM) images were obtained with a JEOL JEM-2100 electron microscope operating at an acceleration voltage of 200 kV. The solutions prepared for DLS experiments were used for SEM and TEM. 5  $\mu\text{L}$  of each of the solution was added on the pre-cleaned surface of the separate glass slide using drop cast method and was allowed to dry in the incubator at 25  $^\circ\text{C}$ . SEM images were taken after sputtering with Au. For preparation of samples for recording TEM images, 1  $\mu\text{L}$  of the solution was added on carbon coated Cu-grid which was allowed to dry in the incubator at 25  $^\circ\text{C}$ .

### **Detection limit**

The detection limit was calculated based on the absorbance or fluorescence titration. To determine the S/N ratio, the absorbance or emission intensity of **PDI-HQ** (10  $\mu\text{M}$ ) or **PDI-HQ**+ $\text{Pb}^{2+}$  was measured by 3 times and the standard deviation of blank solution (without addition of  $\text{Pb}^{2+}$  for **PDI-HQ** or without addition of cysteine for **PDI-HQ**+ $\text{Pb}^{2+}$ ) measurements was determined. The detection limit was then calculated with the equation

$$\text{Detection limit} = 3\sigma_{\text{bi}}/m$$

Where,  $\sigma_{\text{bi}}$  is the standard deviation of blank solution (without addition of  $\text{Pb}^{2+}$  for **PDI-HQ** or without addition of cysteine for **PDI-HQ**+ $\text{Pb}^{2+}$ ) measurements; m is the slope between intensity versus sample concentration.

## Urine sample

A real urine sample of a medically fit person was used for the experiments. For experiments with urine sample we have taken 3 mL of the solution that contains 30  $\mu\text{L}$  **PDI-HQ** in acetonitrile, 1.5 mL of urine and 1.47 mL of HEPES-buffer (0.01 M, pH = 7.2) in cuvette and fluorescence value obtained was compared with the calibration curve to quantify the  $\text{Pb}^{2+}$  ions.

## Data Analysis

All absorption and fluorescence scans were saved as ACSII files and further processed in Excel™ to produce all graphs shown in the chapter. The spectral data were analysed through curve fitting procedures by using non-linear regression analysis SPECFIT 3.0.36 to determine the stability constants and the distribution of various species.

## MATERIAL SYNTHESIS

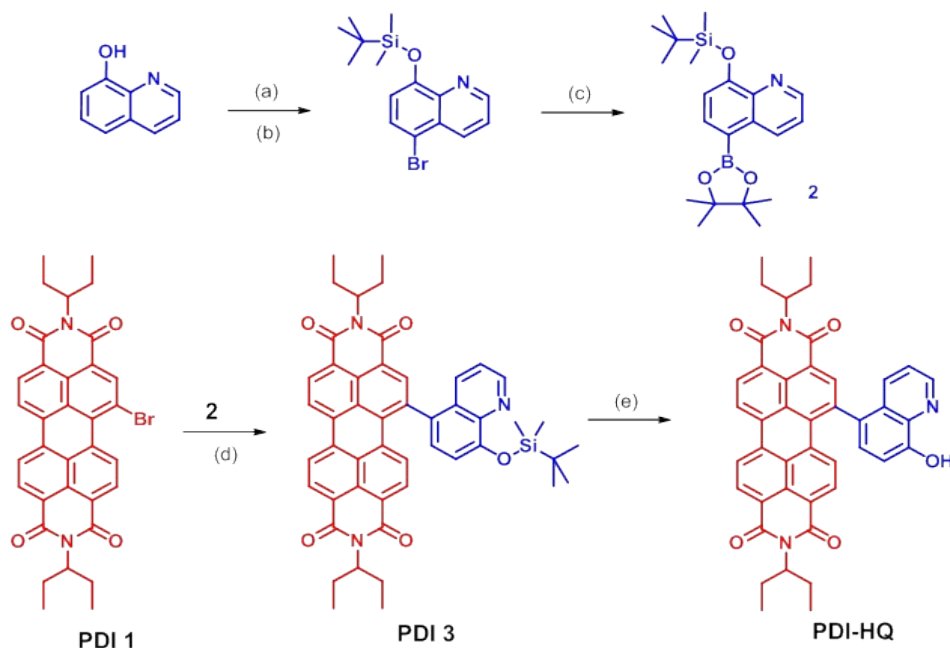

**Scheme 1:** Synthesis and chemical structure of **PDI-HQ**.

8-hydroxyquinoline (5 g, 0.034 mmol) was taken in dichloromethane (150 mL, dry) and tert-butyl dimethylsilyl chloride (5.7 g, 0.038 mol), imidazole (2.46 g, 0.036 mol) were added all at once. The reaction mixture was stirred for 48 hour at RT. After this time interval, the reaction mixture was quenched with 0.1 N HCl solutions, washed with brine solution and crude product silylated 8-hydroxyquinoline was

concentrated under high vacuum. Compound silylated 8-hydroxyquinoline was Isolated as colorless liquid, yield is 80.1% (7.2 g, 0.025 mol);  $R_f = 0.3$  (Et<sub>2</sub>O:hexane 2:98 v/v).

Crude product (5.0 g, 0.019 mol) was dissolved in dichloromethane (120 mL, dry) under nitrogen atmosphere. Bromine (0.49 mL, 0.019 mol) in dichloromethane (20 mL, dry) was added drop-wise at RT under nitrogen atmosphere. The reaction mixture was stirred for 10 h at RT. After this interval, quenched the reaction mixture with saturated solution of sodium thiosulfate, washed with brine and crude product was concentrated under high vacuum. The crude product was purified by column chromatography (ethyl acetate:hexane, 1:99 v/v) to obtained compound **2** as pale yellow liquid; Yield is 92% (6.0 g, 0.017 mol);  $R_f = 0.6$  (Ethyl acetate:hexane 1:99); HRMS (TOF, ESI)  $m/z$  found 339.04; calcd. 340.06 for C<sub>12</sub>H<sub>20</sub>BrNOSi; <sup>1</sup>H NMR (500 MHz, CDCl<sub>3</sub>, 25 °C):  $\delta$  0.27 (s, 6H), 1.07 (s, 9H), 7.07 (d,  $J = 8.0$  Hz, HQ-H7, 1H), 7.47 (dd,  $J_1 = 8.5$  Hz,  $J_2 = 4.0$  Hz, HQH-3, 1H), 7.67 (d,  $J = 8$  Hz, HQH-6, 1H), 8.45(d,  $J = 8.5$  Hz, HQH-4, 1H), 8.87(d,  $J = 4$  Hz, HQH-2, 1H) ppm; <sup>13</sup>C NMR (125 MHz, CDCl<sub>3</sub>, 25 °C):  $\delta = -3.8, 19.0, 26.0, 112.4, 118.4, 122.4, 128.6, 130.6, 135.4, 143.0, 149.1, 153.0$  ppm.

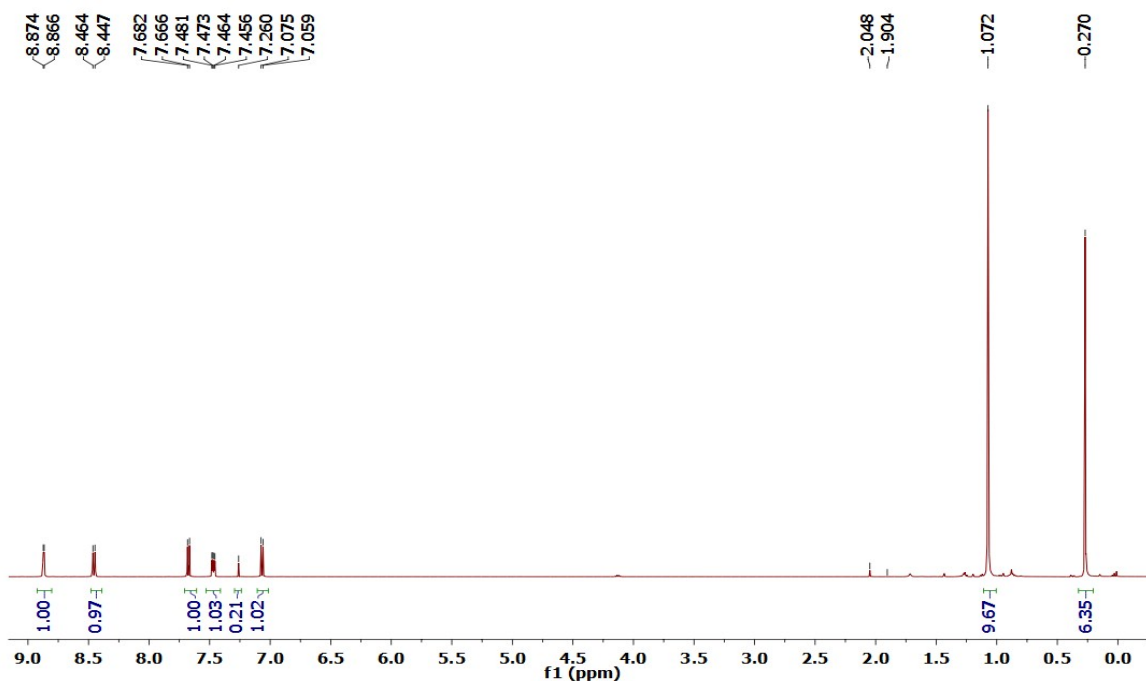

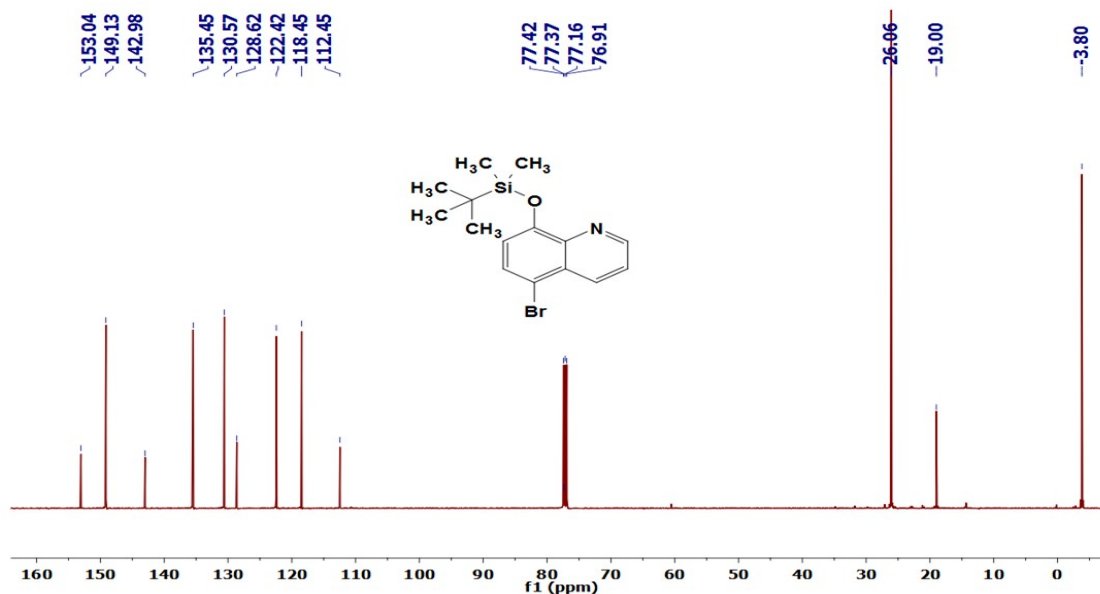

**Figure S1:** <sup>1</sup>H and <sup>13</sup>C NMR spectra of compound **4**.

5-Bromo-8-(*tert*-butyldimethylsilyloxy) quinoline (**4**) (5.0 g, 14.8 mmol) and catalyst PdCl<sub>2</sub>(PPh<sub>3</sub>)<sub>2</sub> (0.5 g, 0.71 mmol) were dissolved in anhydrous 1,4-dioxane (50 mL) under N<sub>2</sub> at RT. Subsequently, triethylamine (7.75 mL, 55.56 mmol) and bis(pinacolatoboron) (5.39 g, 21.2 mmol) were added to the reaction mixture and stirred overnight at 90 °C. The reaction mixture was cooled and poured into water (100 mL), extracted with chloroform and concentrated under high vacuum. The residue was column chromatographed (ethyl acetate/hexane 4:96) to isolate **3** as a pale yellow solid, yield 3.5 g (9.08 mmol, 61.2%); R<sub>f</sub> = 0.5 (ethyl acetate/hexane 4:96); <sup>1</sup>H NMR (500 MHz, CDCl<sub>3</sub>, 25 °C): δ 0.27 (s, 6H), 1.06 (s, 9H), 1.39 (s, 12H), 7.20 (d, *J* = 7.5 Hz, 1H), 7.39 (dd, *J*<sub>1</sub> = 8.5 Hz, *J*<sub>2</sub> = 4.0 Hz, HQH-3, 1H), 8.03 (d, *J* = 7.5 Hz, HQH-6, 1H), 8.83 (dd, *J*<sub>1</sub> = 4.0 Hz, *J*<sub>2</sub> = 1.5 Hz, HQH-4, 1H), 9.08 (dd, *J*<sub>1</sub> = 8.5 Hz, *J*<sub>2</sub> = 1.5 Hz, HQH-2, 1H) ppm; <sup>13</sup>C NMR (125 MHz, CDCl<sub>3</sub>, 25 °C): δ = -3.70, 19.10, 22.79, 25.11, 26.12, 31.73, 34.82, 83.73, 117.34, 121.61, 133.93, 136.63, 137.44, 142.15, 148.10, 156.18 ppm; HR-MS: *m/z* found 386.2332 (M<sup>+</sup>+1); calcd. 385.2245 for [C<sub>21</sub>H<sub>32</sub>BNO<sub>3</sub>Si].

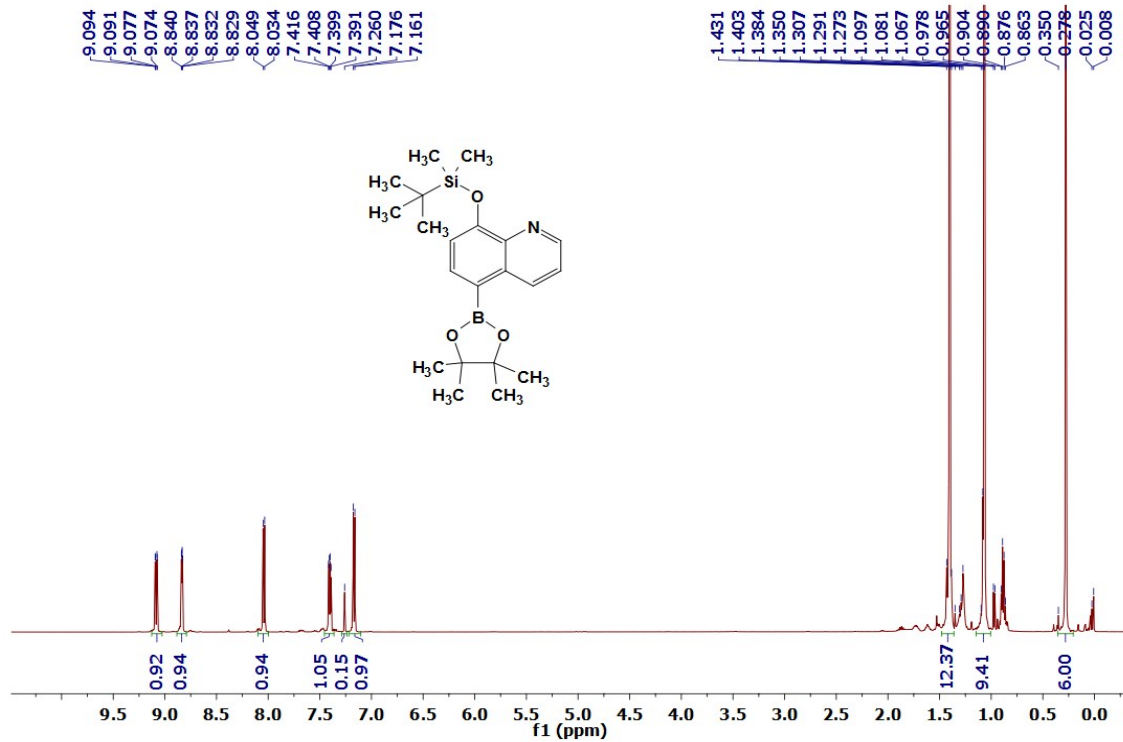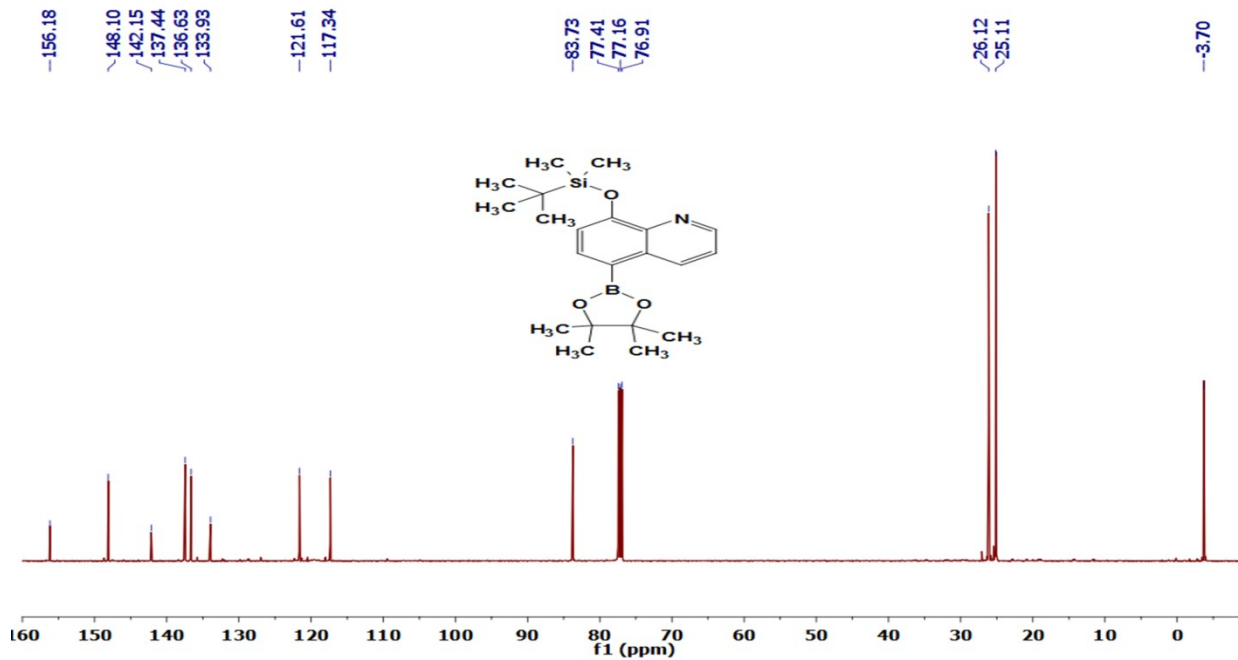

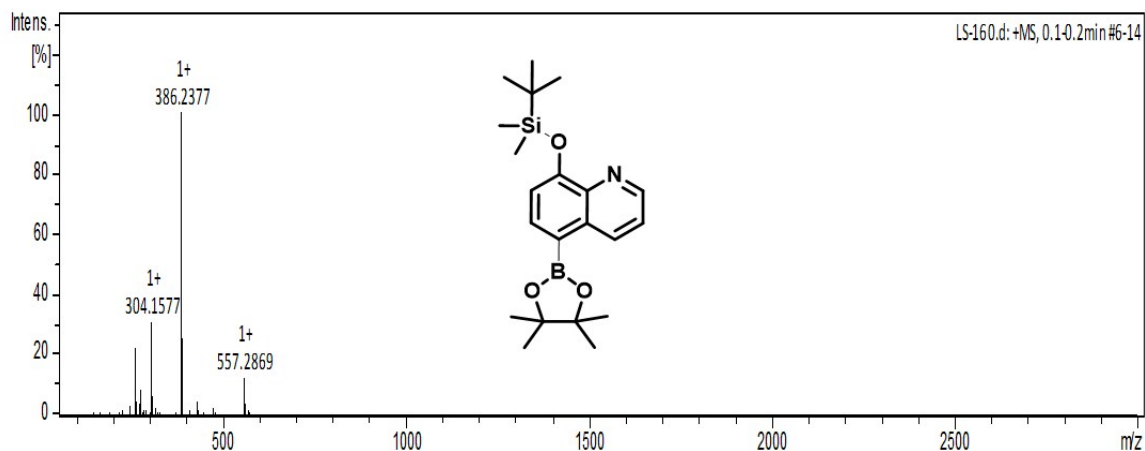

**Figure S2:**  $^1\text{H}$ ,  $^{13}\text{C}$  NMR and Mass spectra of compound **3**.

### Synthesis of PDI **1**

**PDI 2** (1.0 gm, 1.64 mmol) and  $\text{Na}_2\text{CO}_3$  (1.77 g, 16.70 mmol) were dissolved in toluene (50 mL), ethanol (15 mL) and water (25 mL) mixture and solution was purged with  $\text{N}_2$  for 10 min. Subsequently, compound **3** (0.94 g, 2.44 mmol) and catalyst  $\text{Pd}(\text{PPh}_3)_4$  (0.37 g, 0.32 mmol) were added to the reaction mixture and stirred at  $70^\circ\text{C}$  for 10 h. After this time interval the reaction mixture was evaporated under vacuum. The remaining residue was poured into water, extracted with chloroform, dried and concentrated under vacuum. The residue was further purified by column chromatography ( $\text{SiO}_2$ ,  $\text{CHCl}_3/\text{hexane}$  10:90) to isolate PDI-SiHQ as a red solid, yield 600 mg (0.762 mmol, 46.3%);  $R_f = 0.45$  ( $\text{CHCl}_3/\text{hexane}$  10:90);  $^1\text{H}$  NMR (500 MHz,  $\text{CDCl}_3$ ,  $25^\circ\text{C}$ ):  $\delta$  0.36 (s, 3 H), 0.41 (s, 3H), 0.86 (t,  $J = 7.5$  Hz, 6H), 0.93 (t,  $J = 7.5$  Hz, 6H), 1.14 (s, 9H), 1.85-1.97 (m, 4H), 2.15-2.30 (m, 4H), 4.97-5.09 (m, 2H), 7.20 (dd,  $J_1 = 8.5$  Hz,  $J_2 = 4.0$  Hz, 1H), 7.37 (d,  $J = 7.5$  Hz, 1H), 7.52 (d,  $J = 7.5$  Hz, 1H), 7.64 (d,  $J = 8.0$  Hz, 1H), 7.85-7.88 (m, 2H), 8.57 (s, 1H), 8.64-8.76 (m, 4H), 8.90 (d,  $J = 2.5$  Hz, 1H) ppm;  $^{13}\text{C}$  NMR (125 MHz,  $\text{CDCl}_3$ ,  $25^\circ\text{C}$ ):  $\delta$  153.99, 149.49, 143.15, 138.57, 135.13, 134.61, 134.50, 133.98, 132.97, 132.93, 129.32, 129.10, 128.80, 128.05, 127.75, 127.40, 126.53, 123.72, 122.96, 122.34, 119.07, 77.37, 57.91, 57.73, 29.84, 26.13, 25.16, 25.06, 15.47, 11.44, -3.70, -3.73 ppm.



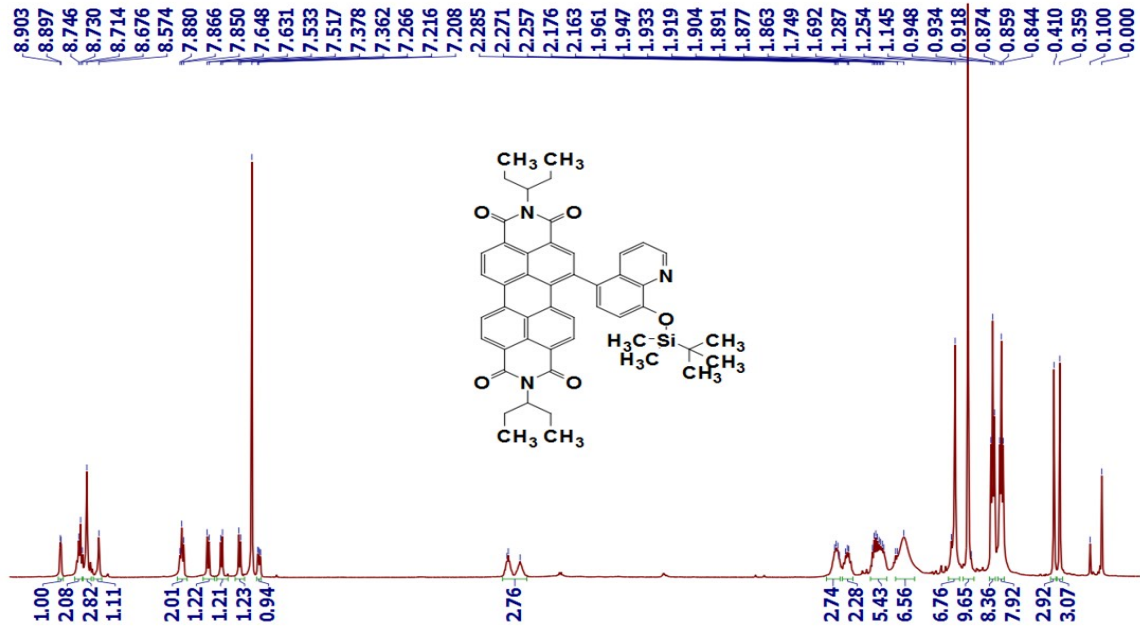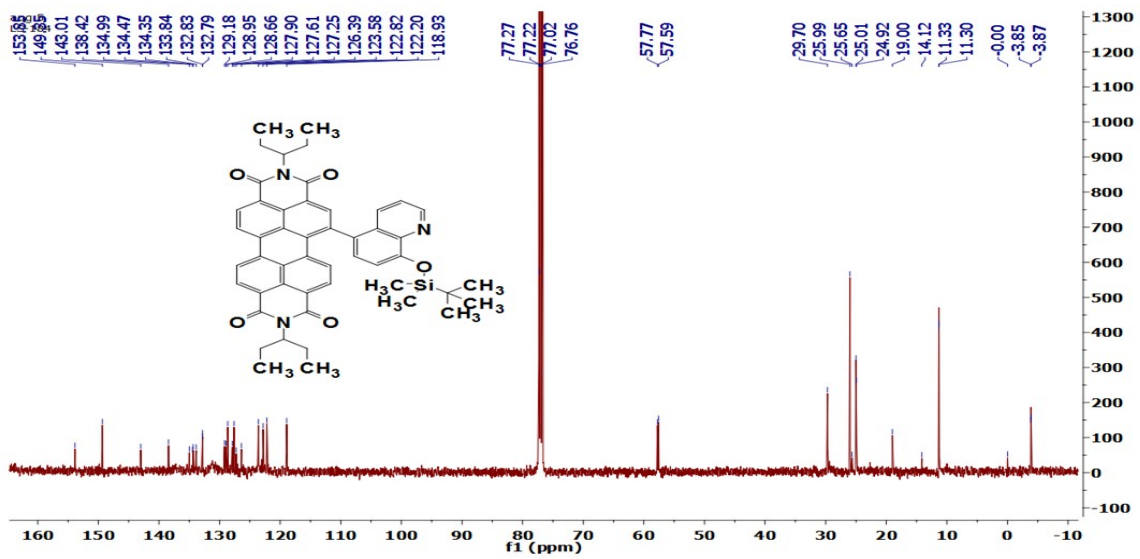

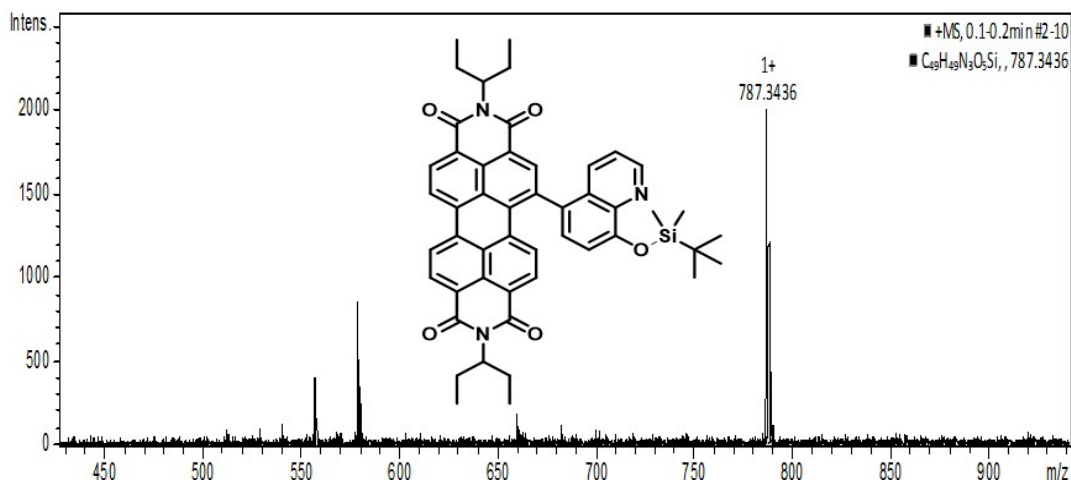

**Figure S3:**  $^1\text{H}$ ,  $^{13}\text{C}$  NMR and Mass spectra of compound **PDI 1**.

### Synthesis of PDI-HQ

In a 50 mL round bottom flask, **PDI 1** (100 mg, 0.127 mmol) was dissolved in THF (10 mL). Then 1.0 M solution of *tert*-butyl ammonium fluoride in THF (15 mL) was added and mixture was stirred for 24 h at RT. After this interval, the solvent was removed and residue was dissolved in chloroform and washed with water. The organic solvent dried over  $\text{Na}_2\text{SO}_4$  and solvent was removed by rotary evaporation. The crude product was purified by column chromatography ( $\text{SiO}_2$ , chloroform/ hexane) to isolate **PDI-HQ**, as a red solid (60 mg, 0.089 mmol, 70.2%),  $R_f = 0.4$  (methanol/chloroform 0.5:9.5).

$^1\text{H}$  NMR (500 MHz,  $\text{CDCl}_3$ , 25 °C):  $\delta$  0.86 (t,  $J = 7.5$  Hz, 6H 2x $\text{CH}_3$  ethylpropyl), 0.93 (t,  $J = 7.5$  Hz, 6H, 2x $\text{CH}_3$  ethylpropyl), 1.86-1.96 (m, 4H, 2x $\text{CH}_2$  ethylpropyl), 2.25-2.28 (m, 4H, 2x $\text{CH}_2$  ethylpropyl), 4.97-5.10 (m, 2H, 2xCH ethylpropyl), 7.27 (m, 1H, HQ), 7.38 (d,  $J = 8.0$  Hz, 1H, HQ), 7.62 (d,  $J = 8.0$  Hz, 1H, Perylene ArH), 7.69 (d,  $J = 8.0$  Hz, 1H, HQ), 7.89 (dd,  $J_1 = 8.5$  Hz,  $J_2 = 1.0$  Hz, 1H, HQ), 7.92 (d,  $J = 8.0$  Hz, 1H, Perylene ArH), 8.58 (s, 1H, Perylene ArH), 8.67-8.74 (m, 4H, Perylene ArH), 8.82 (dd,  $J_1 = 4.5$  Hz,  $J_2 = 1.5$  Hz, HQ, 1H) ppm.

$^{13}\text{C}$  NMR (125 MHz,  $\text{CDCl}_3$ , 25 °C):  $\delta$  11.42, 11.46, 25.07, 25.16, 29.08, 57.74, 57.92, 111.27, 122.95, 123.75, 125.40, 127.38, 128.06, 128.72, 128.83, 129.07, 129.31, 130.79, 131.31, 133.52, 134.00, 134.48, 134.61, 135.09, 138.16, 139.19, 148.78, 153.28 ppm

**Mass Spectrum:**  $m/z$  found 674.2658 [ $\text{M}^+ + 1$ ]; calcd. 673.2577 for [ $\text{C}_{43}\text{H}_{35}\text{N}_3\text{O}_5$ ]

**UV-Vis** (99.9%  $\text{H}_2\text{O}:\text{CH}_3\text{CN}$ ):  $\lambda_{\text{max}} = 492$  nm

Fluorescence (99.9% H<sub>2</sub>O:CH<sub>3</sub>CN):  $\lambda_{\max}$  = 660 nm (weak band).

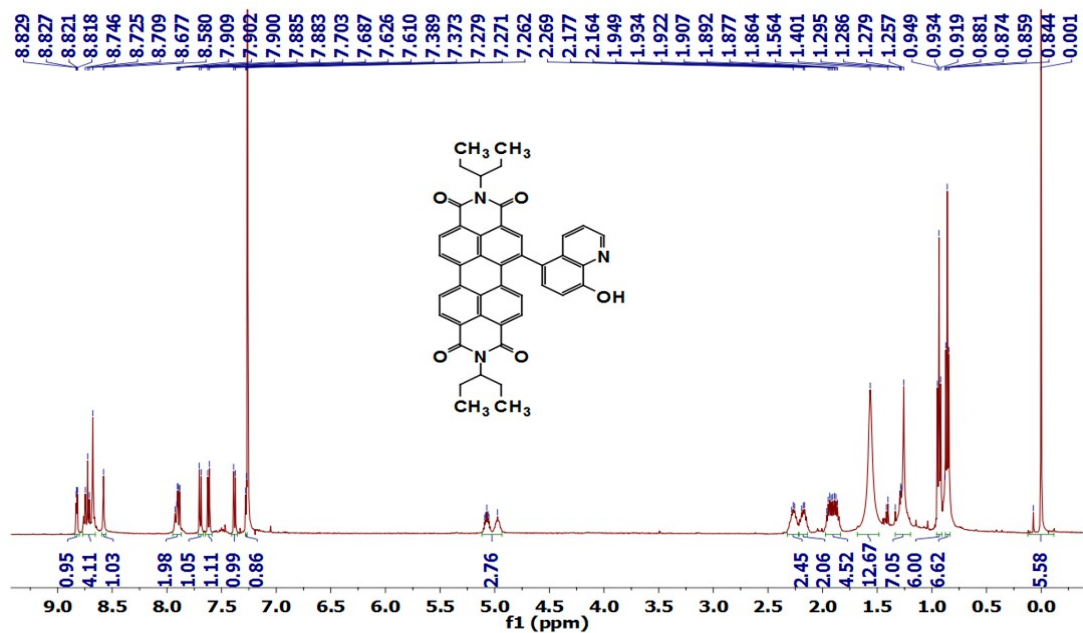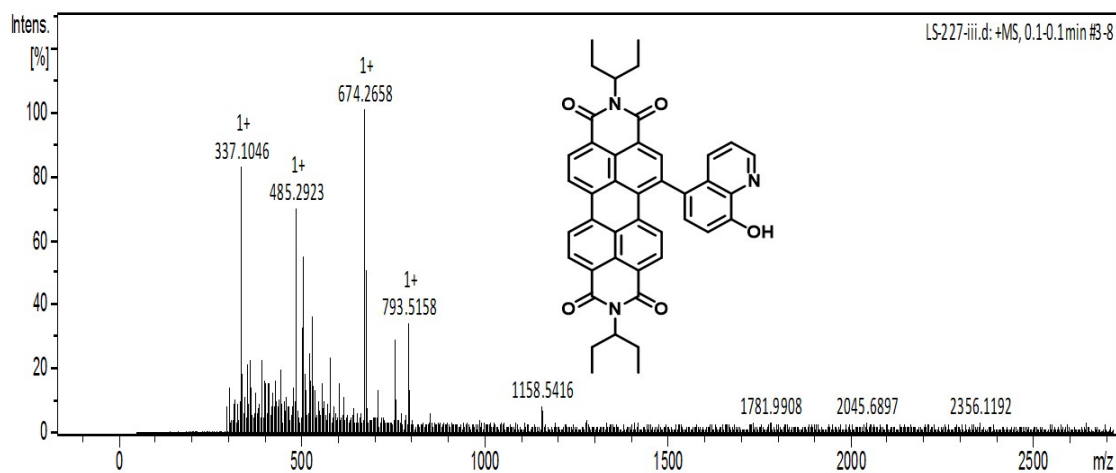

Figure S4: <sup>1</sup>H, <sup>13</sup>C NMR and Mass spectra of compound PDI-HQ.

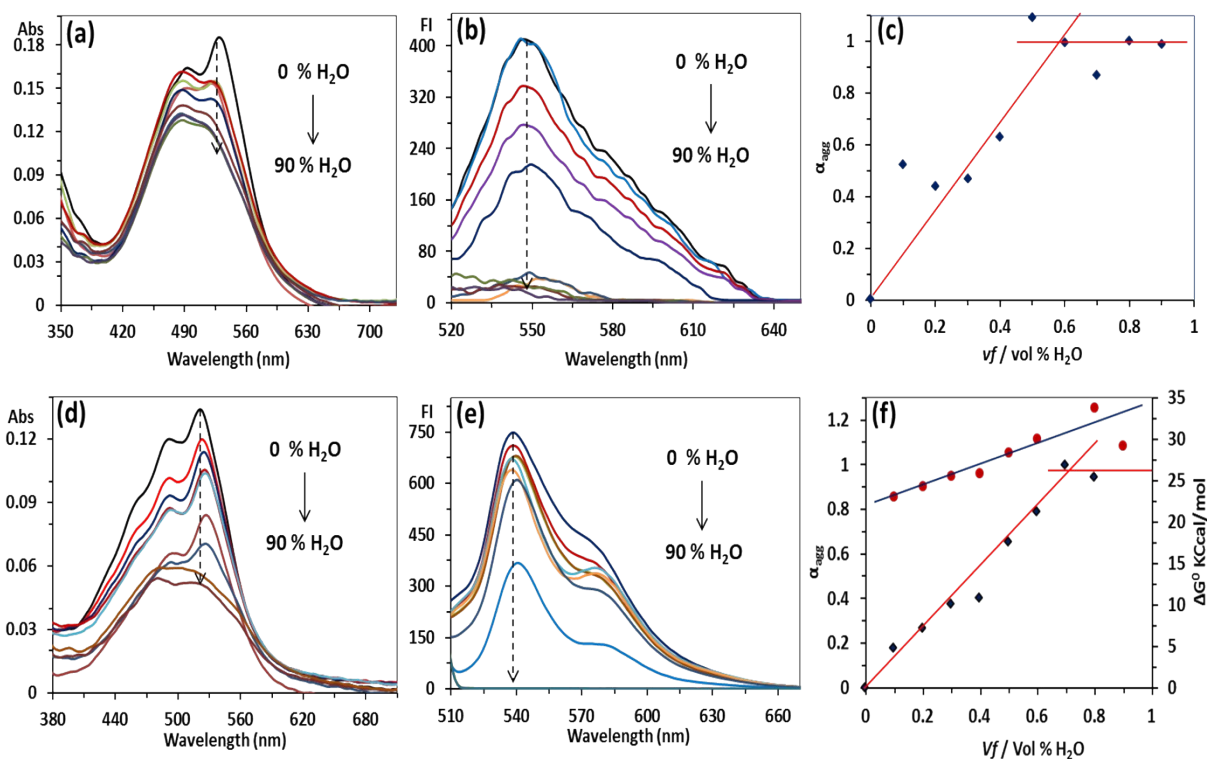

**Figure S5.** Absorption and emission changes in **PDI-HQ** (10  $\mu$ M) after incremental addition of H<sub>2</sub>O to (a,b) DMSO and (d,e) CH<sub>3</sub>CN; Plot of degree of aggregation ( $\alpha_{agg}$ ) vs. water fraction in (c) DMSO and (f) CH<sub>3</sub>CN. (Slit width Ex/Em = 15/9)

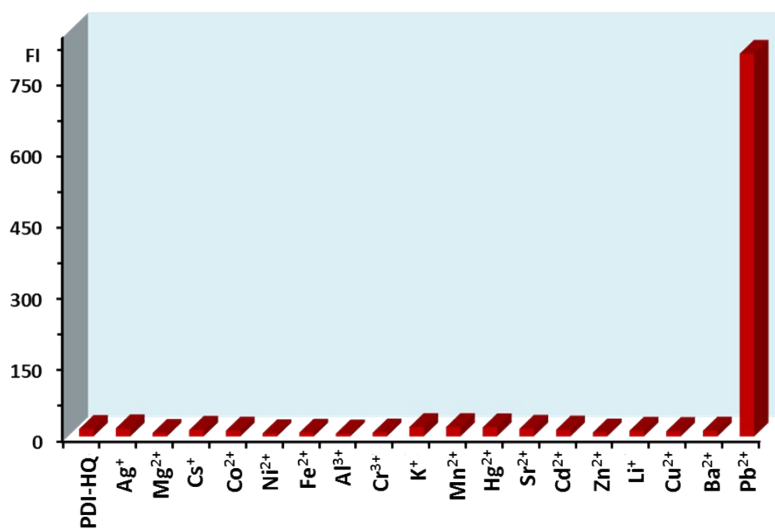

**Figure S6.** Fluorescence intensity changes as observed in **PDI-HQ** (10  $\mu$ M) in the presence of various metal ions recorded in HEPES buffer (0.1% CH<sub>3</sub>CN, pH 7.2).

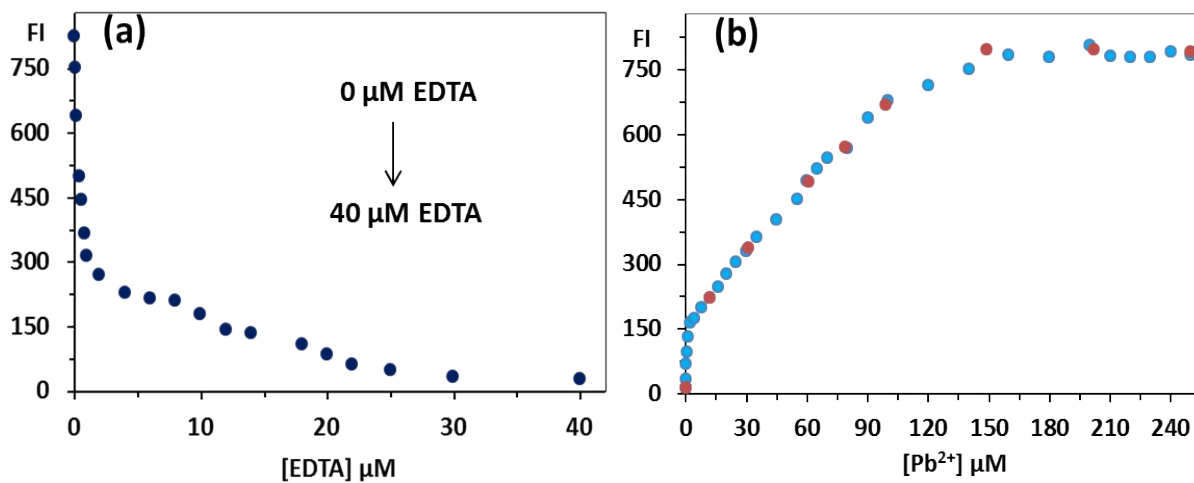

**Figure S7.** (a) Plot of fluorescence intensity of **PDI-HQ–Pb<sup>2+</sup>** aggregates (1:30), HEPES buffer (0.1% CH<sub>3</sub>CN, pH 7.2) on addition of EDTA; (b) Graph showing percentage recovery of Pb<sup>2+</sup> ions in urine samples using calibration curve.

**Table S1:** Application of **PDI-HQ** in determination of Pb<sup>2+</sup> ions in spiked urine samples along with percentage recovery values of Pb<sup>2+</sup> ions in urine samples.

| Sr. No. | Concentration of Pb <sup>2+</sup> ions added (μM) | Concentration of Pb <sup>2+</sup> ions obtained (μM) | Recovery of Pb <sup>2+</sup> (%) |
|---------|---------------------------------------------------|------------------------------------------------------|----------------------------------|
| 1       | 12                                                | 11.8                                                 | 98.33                            |
| 2       | 30                                                | 31                                                   | 103.33                           |
| 3       | 60                                                | 61                                                   | 101.66                           |
| 4       | 80                                                | 79                                                   | 98.75                            |
| 5       | 100                                               | 99                                                   | 99.00                            |
| 6       | 160                                               | 149                                                  | 93.12                            |
| 7       | 200                                               | 202                                                  | 101.00                           |
| 8       | 250                                               | 251                                                  | 100.40                           |

**Table S2:** Change in chemical shift ( $\delta$ ) of perylene P1-P6 protons and 8-hydroxyquinoline protons as observed in  $^1\text{H}$  NMR titration of **PDI-HQ** with  $\text{Pb}^{2+}$  ions recorded in  $\text{DMSO}(d_6)/\text{H}_2\text{O}$  (9:1, v/v).

| Equivalents of $\text{Pb}^{2+}$              | <b>P1<sup>a</sup></b><br>( $\Delta\delta$ ) <sup>b</sup> | <b>P2<sup>a</sup></b><br>( $\Delta\delta$ ) <sup>b</sup> | <b>P3<sup>a</sup></b><br>( $\Delta\delta$ ) <sup>b</sup> | <b>P4<sup>a</sup></b><br>( $\Delta\delta$ ) <sup>b</sup> | <b>P5<sup>a</sup></b><br>( $\Delta\delta$ ) <sup>b</sup> | <b>P6<sup>a</sup></b><br>( $\Delta\delta$ ) <sup>b</sup> |
|----------------------------------------------|----------------------------------------------------------|----------------------------------------------------------|----------------------------------------------------------|----------------------------------------------------------|----------------------------------------------------------|----------------------------------------------------------|
| <b>1 equiv. (10<math>\mu\text{M}</math>)</b> | 7.558<br>(0.063)                                         | 7.758<br>(0.072)                                         | 8.539<br>(0.036)                                         | 8.600<br>(0.041)                                         | 8.902<br>(0.074)                                         | 8.932<br>(0.080)                                         |
| <b>2 equiv. (20<math>\mu\text{M}</math>)</b> | 7.543<br>(0.078)                                         | 7.731<br>(0.101)                                         | 8.530<br>(0.045)                                         | 8.590<br>(0.051)                                         | 8.875<br>(0.101)                                         | 8.915<br>(0.097)                                         |
| <b>3 equiv. (30<math>\mu\text{M}</math>)</b> | 7.504<br>(0.117)                                         | 7.692<br>(0.140)                                         | 8.505<br>(0.070)                                         | 8.565<br>(0.076)                                         | 8.854<br>(0.122)                                         | 8.882<br>(0.130)                                         |
| <b>4 equiv. (40<math>\mu\text{M}</math>)</b> | 7.461<br>(0.160)                                         | 7.652<br>(0.180)                                         | 8.477<br>(0.098)                                         | 8.537<br>(0.104)                                         | overlap                                                  | overlap                                                  |
| <b>5 equiv. (50<math>\mu\text{M}</math>)</b> | 7.364<br>(0.257)                                         | 7.567<br>(0.265)                                         | 8.407<br>(0.168)                                         | 8.472<br>(0.169)                                         | 8.698<br>(0.278)                                         | 8.720<br>(0.292)                                         |

| Equivalents of $\text{Pb}^{2+}$              | <b>HQ-7<sup>a</sup></b><br>( $\Delta\delta$ ) <sup>b</sup> | <b>HQ-3<sup>a</sup></b><br>( $\Delta\delta$ ) <sup>b</sup> | <b>HQ-6<sup>a</sup></b><br>( $\Delta\delta$ ) <sup>b</sup> | <b>HQ-4<sup>a</sup></b><br>( $\Delta\delta$ ) <sup>b</sup> | <b>HQ-2<sup>a</sup></b><br>( $\Delta\delta$ ) <sup>b</sup> | <b>P7<sup>a</sup></b><br>( $\Delta\delta$ ) <sup>b</sup> |
|----------------------------------------------|------------------------------------------------------------|------------------------------------------------------------|------------------------------------------------------------|------------------------------------------------------------|------------------------------------------------------------|----------------------------------------------------------|
| <b>1 equiv. (10<math>\mu\text{M}</math>)</b> | 7.287<br>(0.033)                                           | 7.350<br>(0.005)                                           | 7.637<br>(0.023)                                           | 7.907<br>(0.036)                                           | 8.862<br>(0.012)                                           | 8.299<br>(0.025)                                         |
| <b>2 equiv. (20<math>\mu\text{M}</math>)</b> | 7.271<br>(0.049)                                           | 7.346<br>(0.010)                                           | 7.628<br>(0.032)                                           | 7.895<br>(0.048)                                           | 8.857<br>(0.017)                                           | 8.292<br>(0.032)                                         |
| <b>3 equiv. (30<math>\mu\text{M}</math>)</b> | 7.243<br>(0.077)                                           | 7.338<br>(0.018)                                           | 7.606<br>(0.054)                                           | 7.870<br>(0.073)                                           | 8.839<br>(0.035)                                           | 8.276<br>(0.048)                                         |
| <b>4 equiv. (40<math>\mu\text{M}</math>)</b> | 7.224<br>(0.096)                                           | 7.330<br>(0.026)                                           | 7.580<br>(0.080)                                           | 7.842<br>(0.100)                                           | overlap                                                    | 8.259<br>(0.065)                                         |
| <b>5 equiv. (50<math>\mu\text{M}</math>)</b> | 7.175<br>(0.145)                                           | 7.310<br>(0.046)                                           | 7.509<br>(0.150)                                           | 7.782<br>(0.161)                                           | 8.823<br>(0.051)                                           | 8.218<br>(0.106)                                         |

<sup>a</sup>Chemical shift ( $\delta$ ) in ppm; <sup>b</sup>Change in chemical shift ( $\Delta\delta$ ) in ppm

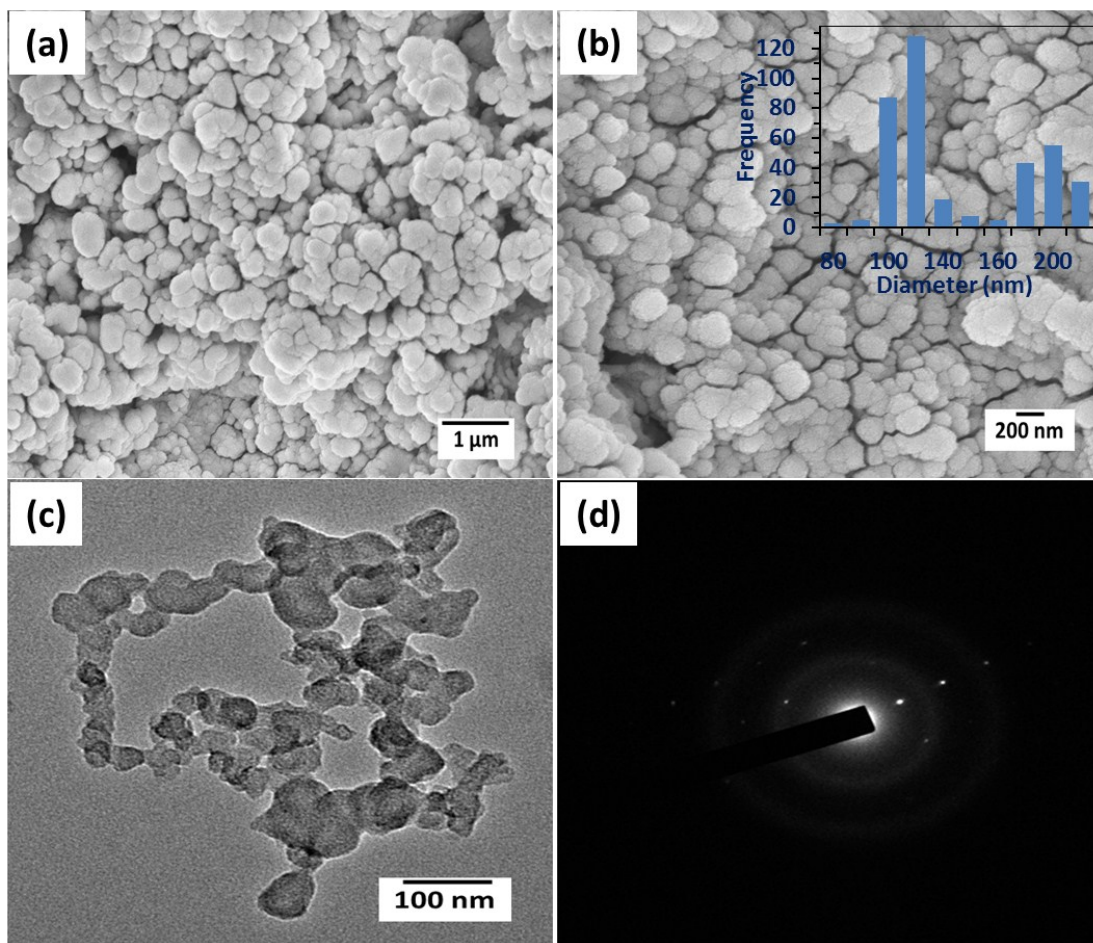

**Figure S8.** SEM (a-b) and TEM (c) micrographs of thin films obtained from drop cast of solution of **PDI-HQ** (10  $\mu\text{M}$ ) in water (0.1%  $\text{CH}_3\text{CN}$ ) showing spherical morphology; (d) SAED pattern recorded in HRTEM.



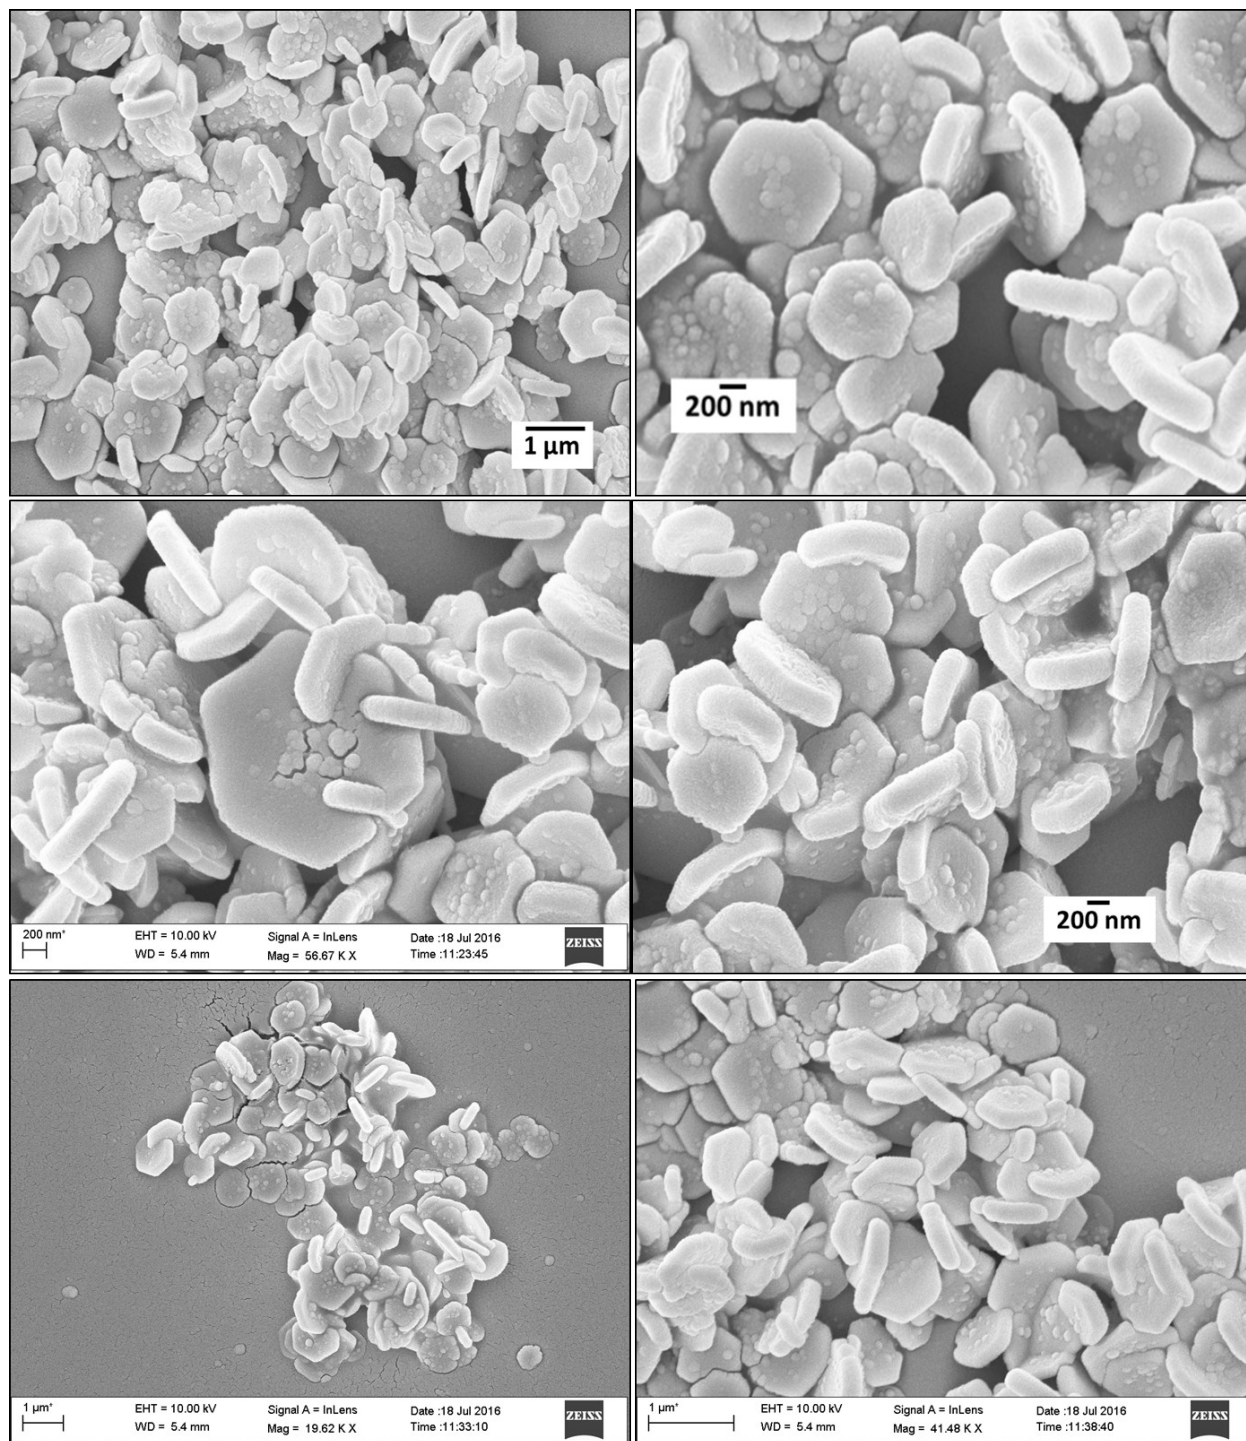

**Figure S9.** SEM micrographs of thin films obtained from drop cast of 6  $\mu\text{l}$  solution of [PDI-HQ (10  $\mu\text{M}$ ) +  $\text{Pb}(\text{ClO}_4)_2$  (300  $\mu\text{M}$ )] in water (0.1%  $\text{CH}_3\text{CN}$ ) showing interlocked hexagonal metallo-supramolecular self-assemblies



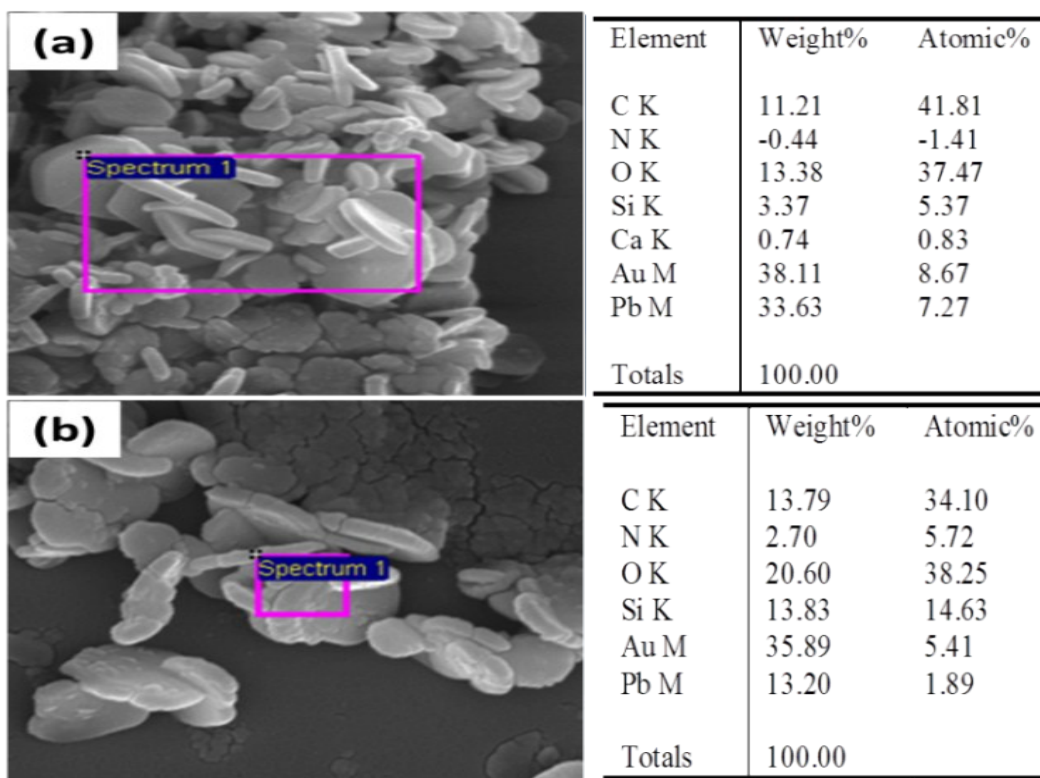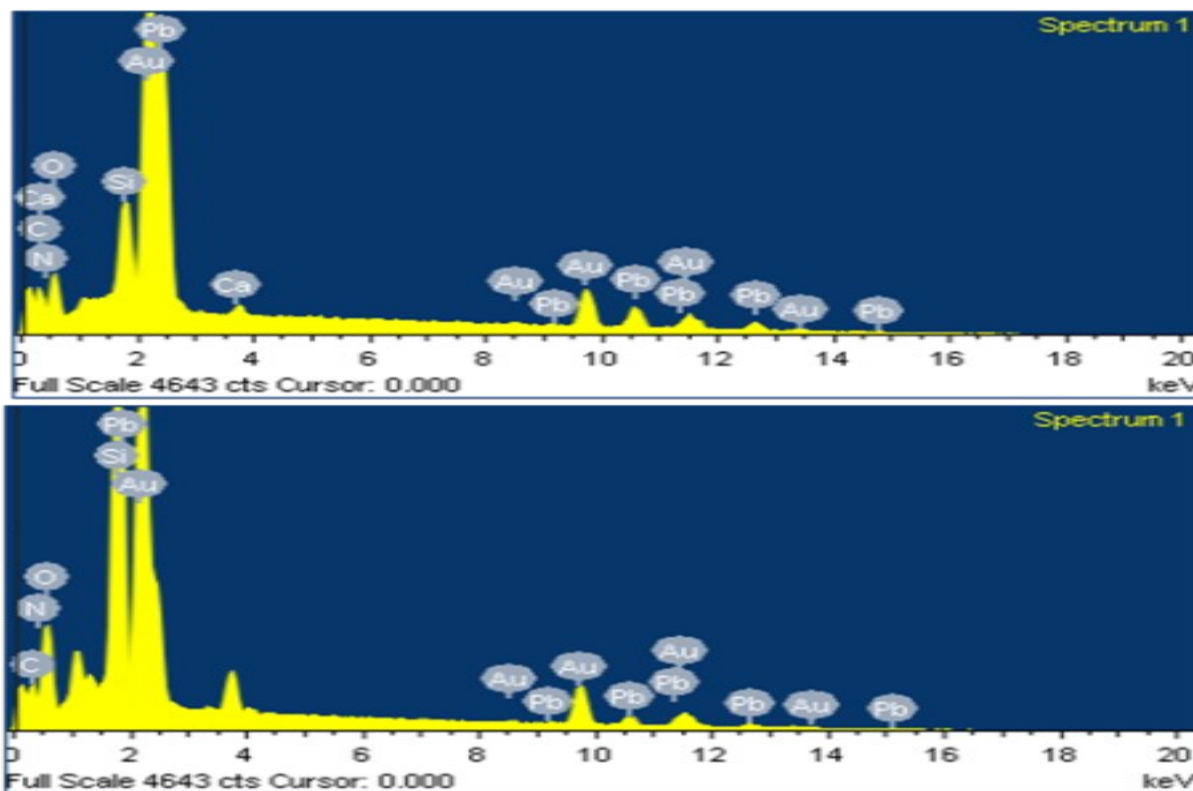

Figure S10. (a-b) EDAX spectrum of PDI-HQ-Pb<sup>2+</sup> aggregates recorded on FESEM.

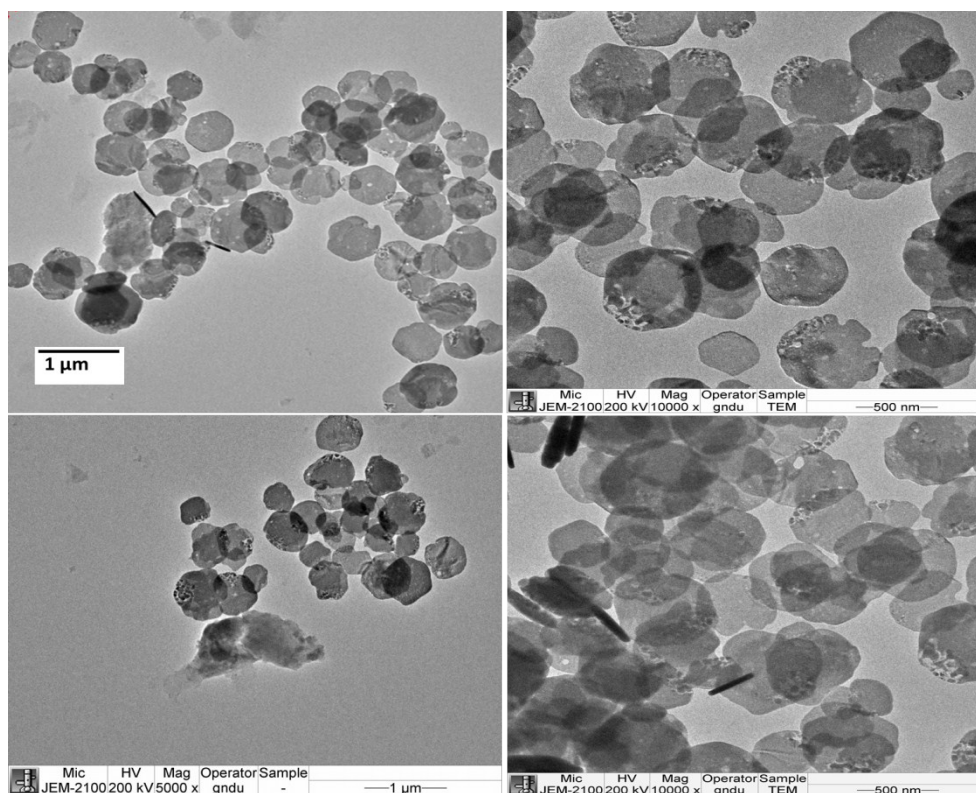

**Figure S11.** TEM micrographs of thin film obtained from drop cast of 6  $\mu\text{l}$  solution of [PDI-HQ (10  $\mu\text{M}$ ) +  $\text{Pb}(\text{ClO}_4)_2$  (300  $\mu\text{M}$ )] in water (0.1%  $\text{CH}_3\text{CN}$ ) showing interlocked hexagonal metallo-supramolecular self-assemblies.

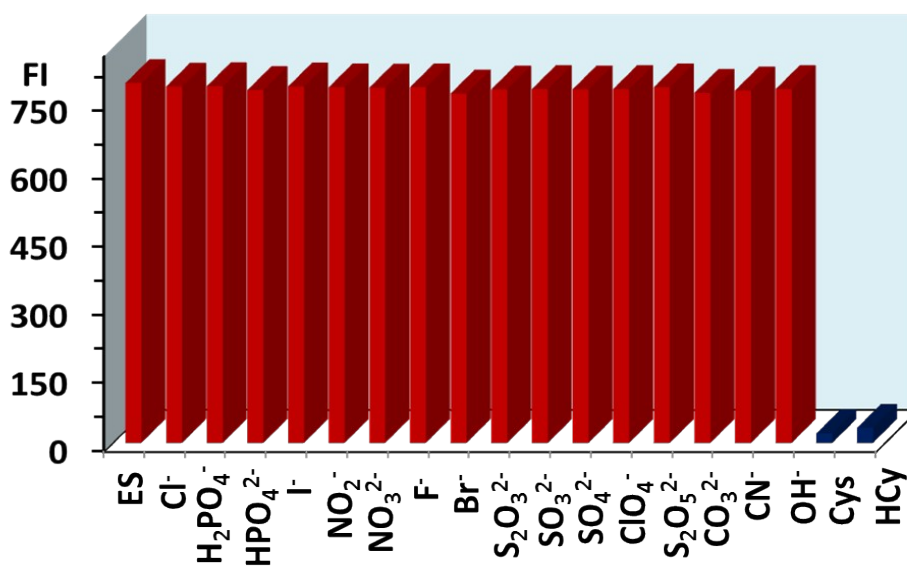

**Figure S12.** Fluorescence intensity changes as observed in PDI-HQ+ $\text{Pb}^{2+}$  ensemble (ES) (10  $\mu\text{M}$ ) in the presence of various anions/thiols recorded in HEPES buffer (0.1%  $\text{CH}_3\text{CN}$ , pH 7.2).

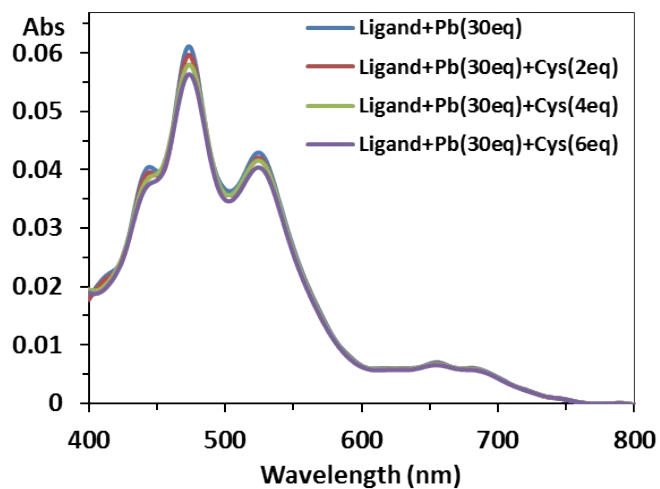

**Figure S13.** Absorbance spectra of **PDI-HQ-Pb<sup>2+</sup>** ensemble (10 μM) after the incremental addition of cysteine recorded in HEPES buffer (0.1% CH<sub>3</sub>CN), pH 7.2.

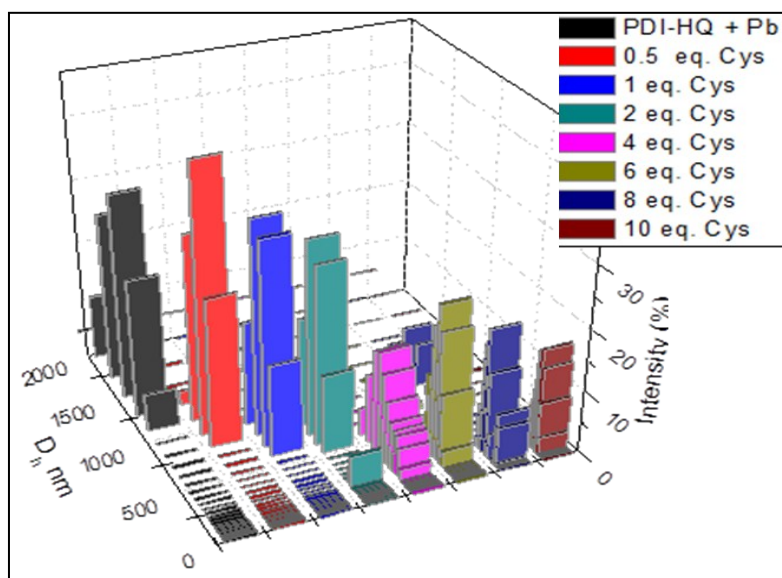

**Figure S14.** DLS titration showing gradual decrease in the aggregate size upon titration of **PDI-HQ+Pb<sup>2+</sup>** ensemble with Cysteine.

**Table S3:** Table showing the Z average value for the aggregates in nm for titration of **PDI-HQ** with  $Pb^{2+}$  and titration of **PDI-HQ**+ $Pb^{2+}$  complex with Cys.

|                                                    | Z Aggregates (nm) |                                                         | Z Aggregates (nm) |
|----------------------------------------------------|-------------------|---------------------------------------------------------|-------------------|
| <b>PDI-HQ</b>                                      | 128.26            | <b>PDI-HQ – <math>Pb^{2+}</math> (50 Equiv.)</b>        | 1579.656          |
| <b>PDI-HQ – <math>Pb^{2+}</math> (1 Equiv.)</b>    | 157.553           | <b>PDI-HQ – <math>Pb^{2+}</math> + Cys (0.5 Equiv.)</b> | 1150.324          |
| <b>PDI-HQ – <math>Pb^{2+}</math> (3 Equiv.)</b>    | 275.157           | <b>PDI-HQ – <math>Pb^{2+}</math> + Cys (1 Equiv.)</b>   | 990.565           |
| <b>PDI-HQ – <math>Pb^{2+}</math> (5 Equiv.)</b>    | 318.653           | <b>PDI-HQ – <math>Pb^{2+}</math> + Cys (2 Equiv.)</b>   | 865.364           |
| <b>PDI-HQ – <math>Pb^{2+}</math> (10 Equiv.)</b>   | 461.965           | <b>PDI-HQ – <math>Pb^{2+}</math> + Cys (4 Equiv.)</b>   | 571.234           |
| <b>PDI-HQ – <math>Pb^{2+}</math> (15 Equiv.)</b>   | 619.56            | <b>PDI-HQ – <math>Pb^{2+}</math> + Cys (6 Equiv.)</b>   | 498.139           |
| <b>PDI-HQ – <math>Pb^{2+}</math> (20 Equiv.)</b>   | 776.979           | <b>PDI-HQ – <math>Pb^{2+}</math> + Cys (8 Equiv.)</b>   | 353.774           |
| <b>PDI-HQ – <math>Pb^{2+}</math> (22.5 Equiv.)</b> | 890.199           | <b>PDI-HQ – <math>Pb^{2+}</math> + Cys (10 Equiv.)</b>  | 215.376           |
| <b>PDI-HQ – <math>Pb^{2+}</math> (25 Equiv.)</b>   | 1030.920          |                                                         |                   |
| <b>PDI-HQ – <math>Pb^{2+}</math> (30 Equiv.)</b>   | 1193.88           |                                                         |                   |
| <b>PDI-HQ – <math>Pb^{2+}</math> (35 Equiv.)</b>   | 1290.556          |                                                         |                   |
| <b>PDI-HQ – <math>Pb^{2+}</math> (40 Equiv.)</b>   | 1382.61           |                                                         |                   |
| <b>PDI-HQ – <math>Pb^{2+}</math> (50 Equiv.)</b>   | 1618.454          |                                                         |                   |

**Table S4:** Comparison of literature reports for sensing of  $Pb^{2+}$  ions.

|                       | Journal                                                 | Fluorophore              | Solvent             | LOD                                                                    | $\lambda_{em}$ (nm) | Metallo-supramolecular assembly | SEM/TEM studies | Application |
|-----------------------|---------------------------------------------------------|--------------------------|---------------------|------------------------------------------------------------------------|---------------------|---------------------------------|-----------------|-------------|
| 1                     | Present work                                            | Perylene diimide         | 99.9 % Water        | $2.5 \times 10^{-8}$ M                                                 | 660                 | Hexagons (interlocked)          | Yes             | Yes         |
| 2                     | <i>RSC Adv.</i> <b>2016</b> , 6, 656                    | Rhodamine                | HEPES               | $1.5 \times 10^{-8}$ M                                                 | 552                 | No                              | No              | Yes         |
| 3                     | <i>Dalton Trans.</i> <b>2015</b> , 44, 17326            | Rhodamine                | 99% water           | $2.5 \times 10^{-7}$ M<br>$Cu^{2+}$ interferes                         | 576                 | No                              | No              | Yes         |
| 4                     | <i>RSC Adv.</i> <b>2015</b> , 5, 101802                 | Anthraquinone-CD         | Water               | $9.0 \times 10^{-8}$ M                                                 | 557                 | No                              | No              | Yes         |
| 50-33% aqueous medium |                                                         |                          |                     |                                                                        |                     |                                 |                 |             |
| 5                     | <i>J. Photochem. Photobio. A</i> <b>2018</b> , 355, 101 | Methyl red               | $CH_3CN:H_2O$ (1:1) | $5.4 \times 10^{-6}$ M<br>$Cr^{3+}$ , $Hg^{2+}$ , $Cu^{2+}$ interferes | 513 (UV)            | No                              | No              | Yes         |
| 6                     | <i>Dalton Trans.</i> <b>2016</b> , 45, 9187             | Hydroxyl-quinoline based | $CH_3OH:H_2O$ (1:1) | $1.5 \times 10^{-7}$ M                                                 | 407                 | No                              | No              | No          |

|                                               |                                                      |                              |                                                           |                                                                                                                       |     |    |    |        |
|-----------------------------------------------|------------------------------------------------------|------------------------------|-----------------------------------------------------------|-----------------------------------------------------------------------------------------------------------------------|-----|----|----|--------|
| 7                                             | <i>Chem. Asian J.</i> <b>2014</b> , 9, 3397          | Naphthalimide                | CH <sub>3</sub> CN:H <sub>2</sub> O (1:1)                 | 1.6x10 <sup>-7</sup> M<br>Ca <sup>2+</sup> , Cd <sup>2+</sup><br>interfere                                            | 538 | No | No | Yes    |
| 8                                             | <i>Analytica Chimica Acta</i> <b>2012</b> , 751, 135 | Pyrene (quenching)           | DMSO:H <sub>2</sub> O (2:3)                               | 1.0x10 <sup>-5</sup> M                                                                                                | 481 | No | No | No     |
| 9                                             | <i>Anal. Methods</i> <b>2016</b> , 8, 2032           | Azino bis-schiff base        | CH <sub>3</sub> OH:H <sub>2</sub> O (2:1)                 | 8.0x10 <sup>-9</sup> M                                                                                                | 442 | No | No | No     |
| 10                                            | <i>Anal. Methods</i> <b>2013</b> , 5, 169            |                              | DMSO:H <sub>2</sub> O (2:1)                               | 1.8x10 <sup>-7</sup> M                                                                                                |     | No | No | Yes    |
| <i>Pure organic solvent or &lt; 20% water</i> |                                                      |                              |                                                           |                                                                                                                       |     |    |    |        |
| 11                                            | <i>Inorg. Chem.</i> <b>2017</b> , 56, 14533          | Phthalocyanin-Porphyrin      | THF:CH <sub>3</sub> OH (4:1)                              | 2.2x10 <sup>-8</sup> M<br>3.4x10 <sup>-9</sup> M                                                                      | 605 | No | No | No     |
| 12                                            | <i>Analyst</i> <b>2016</b> , 141, 4388               | Quinoline-2-carbohydrazide   | CH <sub>3</sub> OH:H <sub>2</sub> O (4:1)                 | 3.2x10 <sup>-6</sup> M<br>Zn <sup>2+</sup> , Cd <sup>2+</sup><br>interfere                                            | 582 | No | No | No     |
| 13                                            | <i>New J. Chem.</i> <b>2017</b> , 41, 12198          | Naphthalene                  | CH <sub>3</sub> CN:H <sub>2</sub> O (9:1)                 | 9.63x10 <sup>-10</sup> M<br>Ni <sup>2+</sup> , Sn <sup>2+</sup> ,<br>Cu <sup>2+</sup> , Fe <sup>3+</sup><br>interfere | 358 | No | No | No     |
| 14                                            | <i>Tetrahedron Lett.</i> <b>2017</b> , 58, 252       | Schiff-base                  | CH <sub>3</sub> CN:H <sub>2</sub> O (95:5)                | 3.8x10 <sup>-7</sup> M                                                                                                | 508 | No | No | No     |
| 15                                            | <i>RSC Adv.</i> <b>2016</b> , 6, 112728              | Rhodamine-quinoline          | CH <sub>3</sub> CN:H <sub>2</sub> O (95:5)                | 7.0x10 <sup>-9</sup> M                                                                                                | 570 | No | No | Yes    |
| 16                                            | <i>Sens. Actuator B,</i> <b>2015</b> , 208, 258      | Naphthalimide                | CH <sub>3</sub> CN:H <sub>2</sub> O (99:1)                | 5.1x10 <sup>-6</sup> M<br>Fe <sup>3+</sup> , Hg <sup>2+</sup><br>interfere                                            |     | No | No | Yes He |
| 17                                            | <i>Sens. Actuator B,</i> <b>2018</b> , 258, 648      | Spiropyran (UV)              | CH <sub>3</sub> CN                                        | 4x10 <sup>-8</sup> M<br>Cr <sup>3+</sup><br>interfere                                                                 | 482 | No | No | No     |
| 18                                            | <i>RSC Adv.</i> <b>2017</b> , 7, 35528               | Thiacalixarene               | CH <sub>2</sub> Cl <sub>2</sub> -CH <sub>3</sub> CN (1:1) | Zn <sup>2+</sup> , Cd <sup>2+</sup><br>interfere                                                                      | 427 | No | No | No     |
| 19                                            | <i>Dalton Trans.</i> <b>2015</b> , 44, 5790          | Diferrocenyl propane         | CH <sub>3</sub> CN                                        | 4.4x10 <sup>-7</sup> M<br>Cu <sup>2+</sup> , Hg <sup>2+</sup><br>interfere                                            | 420 | No | No | No     |
| 20                                            | <i>Talanta</i> <b>2014</b> , 130, 103                | Triphenylamine-bisthiophenol | CH <sub>3</sub> CN                                        | 1.8x10 <sup>-5</sup> M                                                                                                | 529 | No | No | No     |
